# Supplementary material
Source: Springer Nature journal article supplement (https://www.springermedizin.de/resource/supplementary/13046_2008_123_MOESM5_ESM.pdf/9661676)

S

R

L

ET: 6  
TR: 2527.1  
TE: 21.6  
HEAD  
2.0thk/0.0sp  
Id:DCM / Lin:DCM / Id:ID  
W:795 L:397

I

DFOV: 24.0 x 24.0cm

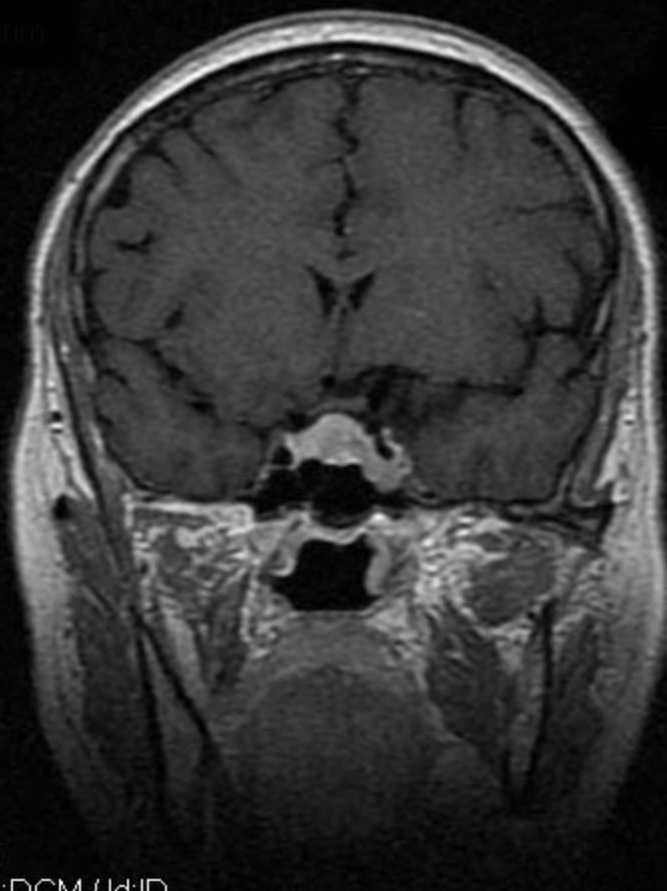

Supplement: MOESM5 [file 9661676]
